# Supplementary material for: Chemo-mechanical effect of chlorine modified TiO2coatings on LMO
Source: Royal Society of Chemistry journal article supplement (doi:10.1039/d2ta06009d), 2022-01-01
Supplement: d2ta06009d1.pdf [file d2ta06009d1.pdf]

## Supporting information

XRD measurements were conducted on 40 nm  $\text{TiO}_2$  samples deposited at different temperatures. Herein, we saw no additional diffraction peaks in samples deposited at higher chamber temperatures.

Crystallization to anatase and rutile phase are not expected at temperatures below  $300^\circ\text{C}$  and  $900^\circ\text{C}$ , respectively. As such we expect the amorphous phase to be preserved in both these films.

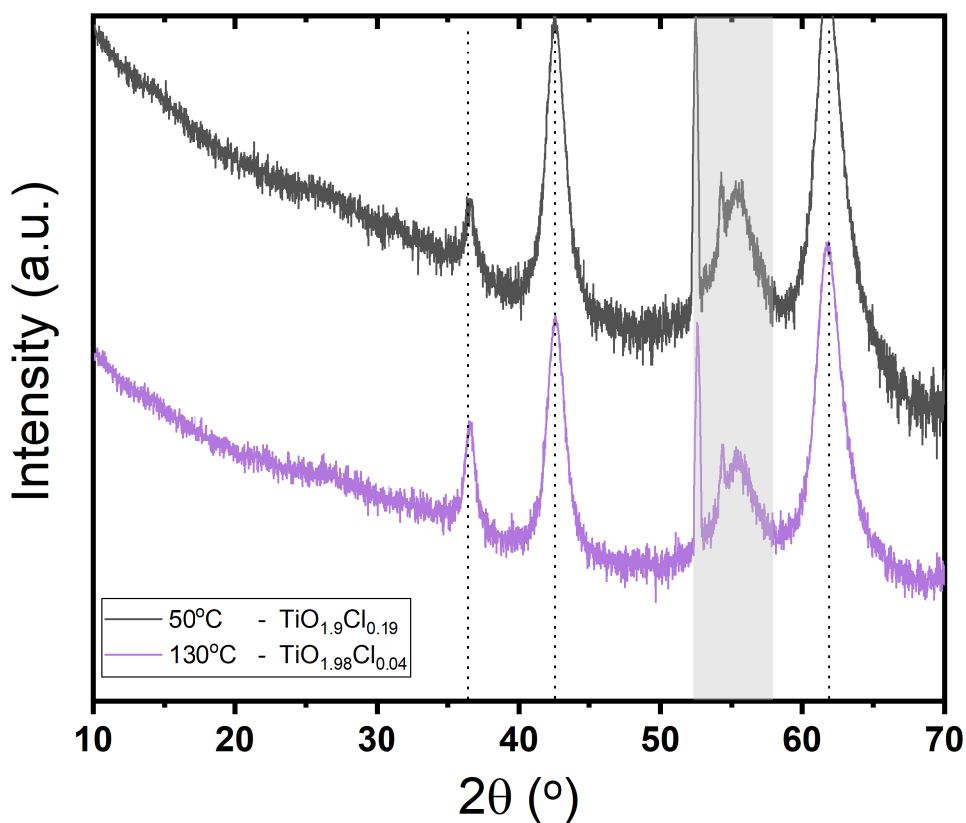

Figure 8: XRD diffraction patterns of 40 nm highly and lowly chlorine modified  $\text{TiO}_2$  films deposited at  $50^\circ\text{C}$  and  $130^\circ\text{C}$ , respectively.

Figure 9 shows the Coulombic efficiency of all charge-discharge cycles shown in figure 4. The grey boxes indicate the cycles after a change in the charging rate. This value does not

reflect the actual charging efficiency, as it is influenced by the change in charging rate. An increase in the charging efficiency is primarily observed in the initial cycles of the reference measurement and the sample with a 1 nm coating, whereas any other samples have a more constant efficiency. The  $\text{TiO}_2/\text{Cl}$  samples show constant stability throughout the procedure. For the 3 nm  $\text{TiO}_2$  coating, a strong variance is observed during the initial cycles, which is linked with the activation behaviour shown in figure 4c. Only after reaching a stable charge-discharge plateau, does the efficiency stabilize.

The trend observed in the final four cycles, namely where LMO with thicker coatings is more efficient, is observed throughout the whole procedure. Further, we see that at higher C-rates the charging efficiency is higher. This is the consequence of the reduced duration of the charge-discharge cycles. At elevated potentials, a parasitic oxidation current will flow. This current leads to an excess charge during the charging step and a charge loss during the discharging step. The total excess or loss scales with the duration of the (dis)charge step.

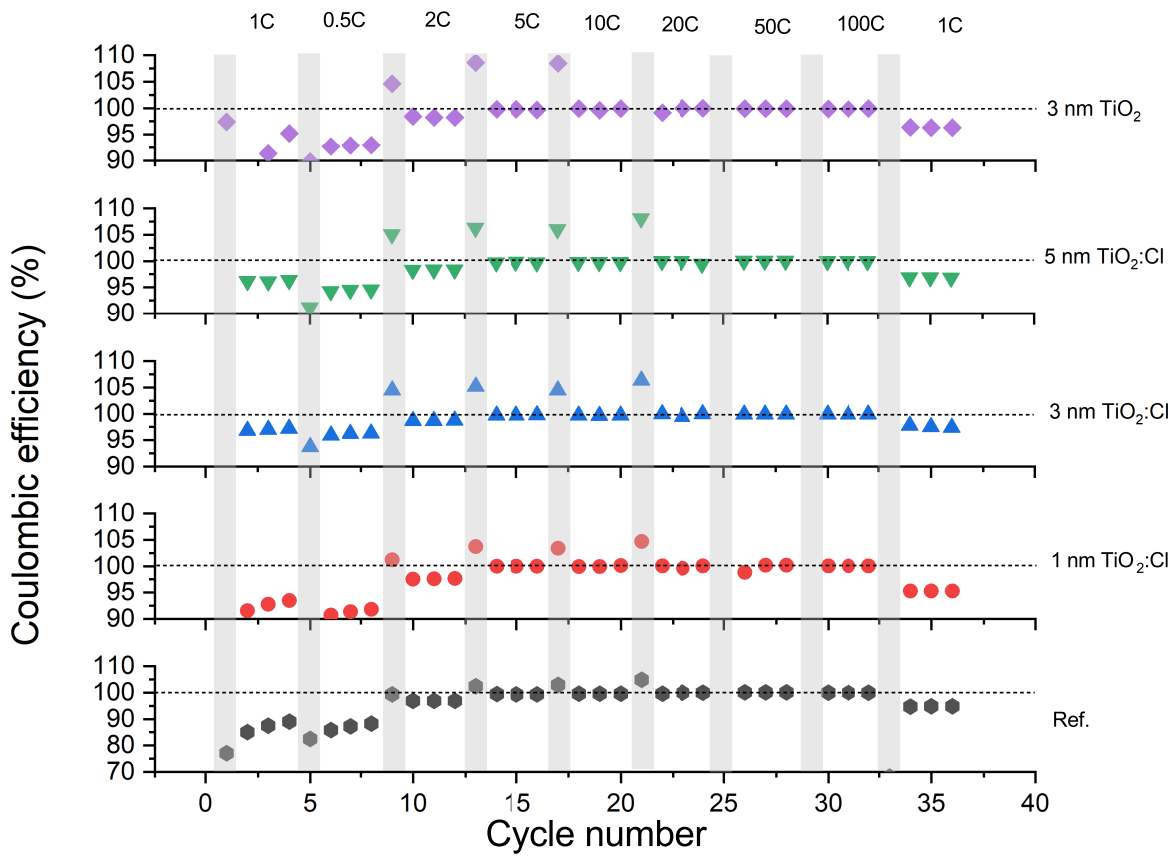

Figure 9: Coulombic efficiencies of all cycles measured in the charge-discharge procedure (Fig. 4).
